# Supplementary material for: Neurogenesis from Sox2 expressing cells in the adult cerebellar cortex
Source: PubMed Central journal article supplement (PMC5522437; doi:10.1038/s41598-017-06150-x), 2017-07-21
Supplement: 41598_2017_6150_MOESM1_ESM.pdf [file 41598_2017_6150_MOESM1_ESM.pdf]

1 **Title**

2 Neurogenesis from Sox2 expressing cells in the adult cerebellar cortex

3

4 **Authors**

5 Julia Ahlfeld<sup>1, 2</sup>, Severin Filser<sup>3, 4</sup>, Felix Schmidt<sup>1</sup>, Annika K. Wefers<sup>5</sup>, Daniel J. Merk<sup>6,</sup>  
6 <sup>7</sup>, Rainer Glaß<sup>8</sup>, Jochen Herms<sup>2, 4</sup> and Ulrich Schüller<sup>1, 9, 10, 11</sup>

7

8 <sup>1</sup> Center for Neuropathology, Ludwig-Maximilians-University, Munich, Germany

9 <sup>2</sup> Division of Clinical Pharmacology, Department of Internal Medicine IV, Ludwig-  
10 Maximilians-University, Munich, Germany

11 <sup>3</sup> German Center for Neurodegenerative Diseases (DZNE), Department for Transla-  
12 tional Brain Research, Munich, Germany

13 <sup>4</sup> Munich Cluster of Systems Neurology (SyNergy), Ludwig-Maximilians-University,  
14 Munich, Germany

15 <sup>5</sup> Division of Neuropathology, Heidelberg University Hospital, Heidelberg, Germany

16 <sup>6</sup> Cancer Biology and Pediatric Oncology, Dana-Farber Cancer Institute, Boston,  
17 Massachusetts

18 <sup>7</sup> Neurobiology, Harvard Medical School, Boston, Massachusetts

19 <sup>8</sup> Department of Neurosurgery, Ludwig-Maximilians-University, Munich, Germany

20 <sup>9</sup> Institute of Neuropathology, University Medical Center, Hamburg-Eppendorf, Ger-  
21 many

22 <sup>10</sup> Research Institute Children's Cancer Center, Hamburg, Germany

23 <sup>11</sup> Department of Pediatric Hematology and Oncology, University Medical Center,  
24 Hamburg-Eppendorf, Germany

25

26

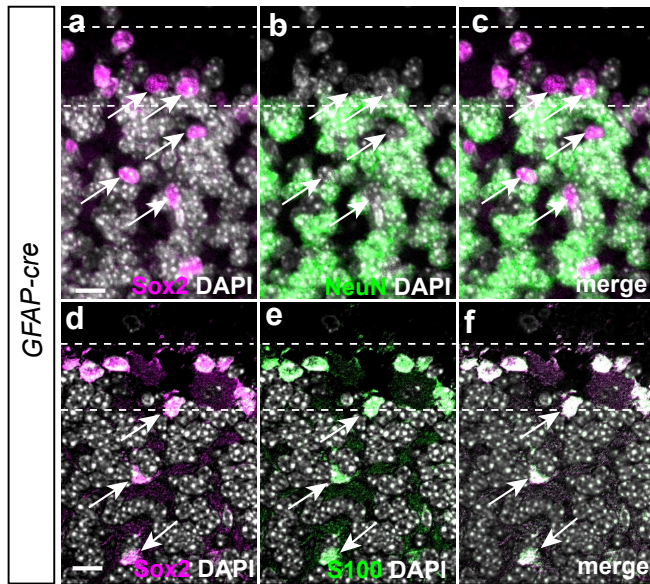

1

2 **Supplementary Figure 1: Sox2 labels differentiated glia, but no granule cells in**  
 3 **the adult cerebellar cortex.**

4 Staining of Sox2 and neuronal marker NeuN shows no colocalization of the two, nei-  
 5 ther within the PCL nor within the IGL (arrows in a - c). Sox2 expressing cells within  
 6 the IGL are of glial lineage as shown by colocalization of Sox2 with glial marker S100  
 7 (d – f). White lines show perimeter of Purkinje cell layer. Scale bars equate to 30  $\mu$ m.

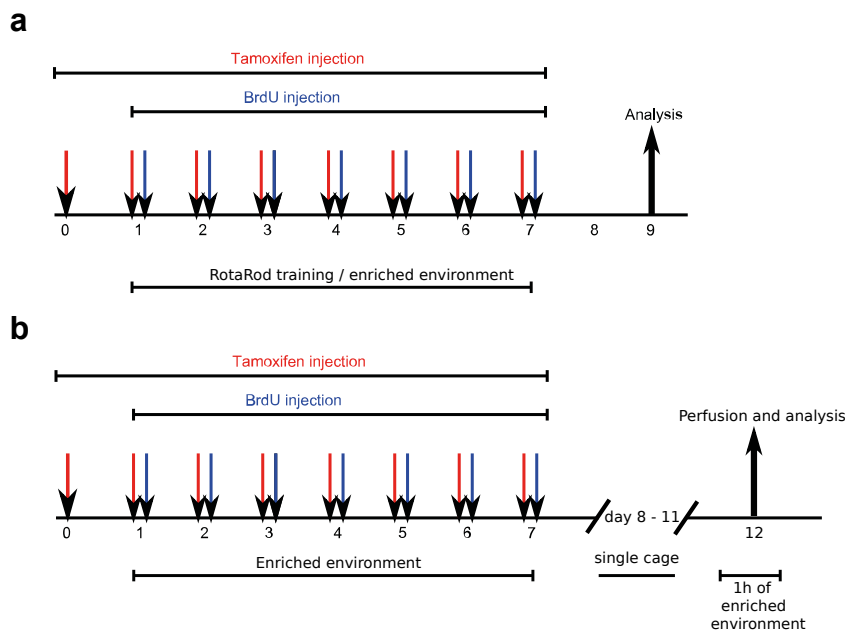

1  
2  
3  
4  
5  
6  
7  
8  
9  
10  
11  
12  
13  
14  
15  
16

**Supplementary Figure 2: Protocols for birth-dating and fate-mapping experiments.** Mice were injected with Tamoxifen and BrdU over a time of 8 and 7 days, respectively, according to the schemes above. Mice were analyzed for adult neurogenesis after one course of injections and training (a). For analysis of synaptic integration of new born neurons, mice were kept in an enriched environment for 7 days with daily Tamoxifen and BrdU injections. Mice were then transferred to single cages for 5 days. For induction of cFos expression, mice were exposed to an enriched environment for an hour before perfusion (b).

1 **Supplementary Video A: Z-stack of progeny from Sox2<sup>+</sup> precursor cells in the**  
2 **adult cerebellar cortex.** Combined BrdU birth-dating and fate-mapping experiments  
3 show RFP<sup>+</sup> progeny from Sox2<sup>+</sup> cells (magenta) that had incorporated BrdU during  
4 the observation period (cyan) and had also acquired neuronal differentiation as  
5 shown by staining for the granule cell marker NeuN (green). Each individual marker  
6 is also shown with the corresponding DAPI channel alone. The confocal images were  
7 taken after a 7/8-day treatment with BrdU and Tamoxifen respectively and another 2  
8 days before sacrifice. To create the z-stack, 34 confocal planes were acquired every  
9 0.4 μm.

10 **Supplementary Video B: Z-stack of progeny from Sox2<sup>+</sup> precursor cells in the**  
11 **adult cerebellar cortex [RFP and DAPI].** RFP<sup>+</sup> progeny from a Sox2<sup>+</sup> cell (magenta;  
12 DAPI - grey) that had arisen during an 8-day course of Tamoxifen treatment and an-  
13 other 2 days before sacrifice. To create the z-stack, 34 confocal planes were ac-  
14 quired every 0.4 μm.

15 **Supplementary Video C: Z-stack of progeny from Sox2<sup>+</sup> precursor cells in the**  
16 **adult cerebellar cortex [BrdU and DAPI].** BrdU birth-dating shows a cell within the  
17 mature IGL that had incorporated BrdU (cyan; DAPI - grey) during the observation  
18 period of a 7-day treatment course with BrdU and another 2 days before sacrifice. To  
19 create the z-stack, 34 confocal planes were acquired every 0.4 μm.

20 **Supplementary Video D: Z-stack of progeny from Sox2<sup>+</sup> precursor cells in the**  
21 **adult cerebellar cortex [NeuN and DAPI].** NeuN-positive granule neurons of the  
22 mature IGL (green; DAPI - grey). The confocal images were taken after a 7/8-day  
23 treatment with BrdU and Tamoxifen respectively. To create the z-stack, 34 confocal  
24 planes were acquired every 0.4 μm.

25
